# Supplementary material for: NaVSeO5: synergistic combinations to synthesize excellent birefringent materials
Source: Royal Society of Chemistry journal article supplement (doi:10.1039/d4qi00513a), 2024-01-01
Supplement: d4qi00513a1.pdf [file d4qi00513a1.pdf]

## **NaVSeO<sub>5</sub>: Synergistic Combinations to Excellent Birefringent Materials**

Qiuyuan Feng,<sup>a#</sup> Jialong Wang,<sup>b#</sup> Changyou Liu,<sup>b</sup> Qun Jing,<sup>b\*</sup>, and Xiaoyu Dong<sup>c\*</sup>

<sup>a</sup> *College of Chemistry and Chemical Engineering, Xinjiang Normal University, Urumqi, Xinjiang 830054, P. R. China.*

<sup>b</sup> *School of Physical Science and Technology, Xinjiang University, 777 Huarui Road, Urumqi, 830017, P. R. China.*

<sup>c</sup> *Engineering Department of Chemistry and Environment, Xinjiang Institute of Engineering, 236 Nanchang Road, Urumqi, Xinjiang 830091, P. R. China.*

*\*To whom correspondence should be addressed, E-mails: qunjing@xju.edu.cn (Qun Jing); dxy@xjie.edu.cn (Xiaoyu Dong)*

*#These authors contributed equally to this work.*

---

## Content

**CCDC number:** 2334821

**Table S1.** Atomic coordinates ( $\times 10^4$ ) and equivalent isotropic displacement parameters ( $\text{\AA}^2 \times 10^3$ ) for  $n\text{NaVSeO}_5$ .  $U_{\text{eq}}$  is defined as one-third of the trace of the orthogonalized  $U_{ij}$  tensor.

**Table S2.** Anisotropic displacement parameters ( $\text{\AA}^2 \times 10^3$ ) for  $\text{NaVSeO}_5$ . The anisotropic displacement factor exponent takes the form:  $2\pi^2[h^2a^*2U_{11}+2hka^*b^*U_{12}+\dots]$ .

**Table S3.** Selected bond lengths ( $\text{\AA}$ ) and angles ( $^\circ$ ) for  $\text{NaVSeO}_5$ .

**Table S4.** Previously reported partial bond lengths ( $\text{\AA}$ ) and angles ( $^\circ$ ) for vanadium selenates.

**Table S5.** Comparison of birefringence in some crystals.

**Figure S1.** Thermal properties of TG-DSC curves for  $\text{NaVSeO}_5$ .

**Figure S2.** Powder X-ray diffraction patterns of annealing experiments on  $\text{NaVSeO}_5$ .

**Figure S3.** Comparison of birefringence in some crystals.

**Table S1.** Atomic coordinates ( $\times 10^4$ ) and equivalent isotropic displacement parameters ( $\text{\AA}^2 \times 10^3$ ) for  $n\text{NaVSeO}_5$ .  $U_{\text{eq}}$  is defined as one-third of the trace of the orthogonalized  $U_{ij}$  tensor.

| Atom  | x/a     | y/b      | z/c     | U(eq) | BVS   |
|-------|---------|----------|---------|-------|-------|
| Na(1) | 7368(2) | 857(7)   | 1272(2) | 23(1) | 1.023 |
| V(1)  | 9091(1) | 5725(2)  | 1349(1) | 9(1)  | 5.035 |
| Se(1) | 9223(1) | 2085(1)  | 3896(1) | 9(1)  | 3.955 |
| O(1)  | 9242(2) | -46(10)  | 1388(3) | 13(1) | 1.852 |
| O(2)  | 9501(2) | 4997(9)  | 3036(3) | 11(1) | 2.042 |
| O(3)  | 8139(2) | 5350(10) | 981(3)  | 16(1) | 2.011 |
| O(4)  | 9138(2) | 5246(10) | 4850(3) | 13(1) | 2.018 |
| O(5)  | 8278(2) | 1307(10) | 3147(3) | 14(1) | 2.090 |

<sup>a</sup>  $U_{\text{eq}}$  is defined as one-third of the trace of the orthogonalized  $U_{ij}$  tensor.

<sup>b</sup> Bond valence sums (BVS) are calculated by using the bond-valence model ( $S_i = \exp [(R_o - R_i) / B]$ , where  $R_o$  is an empirical constant,  $R_i$  is the length of bond  $i$  (in angstroms), and  $B = 0.37 \text{ \AA}$ )

**Table S2.** Anisotropic displacement parameters ( $\text{\AA}^2 \times 10^3$ ) for  $\text{NaVSeO}_5$ . The anisotropic displacement factor exponent takes the form:  $2\pi^2[h^2a^2U_{11}+2hka^*b^*U_{12}+\dots]$ .

| Atom  | $U_{11}$ | $U_{22}$ | $U_{33}$ | $U_{23}$ | $U_{13}$ | $U_{12}$ |
|-------|----------|----------|----------|----------|----------|----------|
| Na(1) | 22(1)    | 27(1)    | 17(1)    | 3(1)     | 4(1)     | -8(1)    |
| V(1)  | 14(1)    | 7(1)     | 8(1)     | 0(1)     | 6(1)     | 0(1)     |
| Se(1) | 13(1)    | 7(1)     | 9(1)     | 0(1)     | 5(1)     | 0(1)     |
| O(1)  | 18(2)    | 11(2)    | 9(2)     | 0(1)     | 3(2)     | 1(2)     |
| O(2)  | 17(2)    | 9(2)     | 7(2)     | 0(1)     | 6(2)     | -1(2)    |
| O(3)  | 16(2)    | 17(2)    | 16(2)    | 3(2)     | 7(2)     | 0(2)     |
| O(4)  | 16(2)    | 12(2)    | 12(2)    | -1(2)    | 7(2)     | -1(2)    |
| O(5)  | 14(2)    | 15(2)    | 13(2)    | -1(2)    | 4(2)     | -2(2)    |

---

**Table S3.** Selected bond lengths (Å) and angles (°) for NaVSeO<sub>5</sub>.

---

|                     |            |                     |            |
|---------------------|------------|---------------------|------------|
| Na(1)-O(3)          | 2.339(4)   | V(1)-O(1)           | 2.230(4)   |
| Na(1)-O(3)#1        | 2.631(5)   | V(1)-O(2)#6         | 2.398(4)   |
| Na(1)-O(3)#4        | 2.639(5)   | V(1)-O(2)           | 1.956(4)   |
| Na(1)-O(4)#2        | 2.572(5)   | V(1)-O(3)           | 1.625(4)   |
| Na(1)-O(5)#2        | 2.367(4)   | V(1)-O(4)#7         | 1.932(4)   |
| Na(1)-O(5)#3        | 2.632(5)   | Se(1)-O(2)          | 1.750(3)   |
| Na(1)-O(5)          | 2.293(5)   | Se(1)-O(4)          | 1.743(4)   |
| V(1)-O(1)#5         | 1.644(4)   | Se(1)-O(5)          | 1.644(4)   |
| O(3)-Na(1)-O(3)#1   | 87.32(15)  | O(5)#2-Na(1)-O(5)#3 | 100.17(15) |
| O(3)#1-Na(1)-O(3)#4 | 72.69(15)  | O(1)#5-V(1)-O(1)    | 164.2(2)   |
| O(3)-Na(1)-O(3)#4   | 100.74(16) | O(1)#5-V(1)-O(2)#6  | 87.64(16)  |
| O(3)-Na(1)-O(4)#2   | 124.34(16) | O(1)-V(1)-O(2)#6    | 76.65(13)  |
| O(3)-Na(1)-O(5)#3   | 79.30(15)  | O(1)#5-V(1)-O(2)    | 96.81(17)  |
| O(3)-Na(1)-O(5)#2   | 171.59(18) | O(1)#5-V(1)-O(4)#7  | 98.63(17)  |
| O(3)#1-Na(1)-O(5)#3 | 114.78(15) | O(2)-V(1)-O(1)      | 80.88(14)  |
| O(4)#2-Na(1)-O(3)#4 | 111.55(15) | O(2)-V(1)-O(2)#6    | 73.55(15)  |
| O(4)#2-Na(1)-O(3)#1 | 62.55(12)  | O(3)-V(1)-O(1)#5    | 104.2(2)   |
| O(4)#2-Na(1)-O(5)#3 | 74.00(14)  | O(3)-V(1)-O(1)      | 91.60(17)  |
| O(5)-Na(1)-O(3)#1   | 156.54(17) | O(3)-V(1)-O(2)#6    | 168.03(17) |
| O(5)-Na(1)-O(3)#4   | 88.98(15)  | O(3)-V(1)-O(2)      | 102.69(17) |
| O(5)#2-Na(1)-O(3)#4 | 78.67(14)  | O(3)-V(1)-O(4)#7    | 98.45(18)  |

---

---

|                     |            |                    |            |
|---------------------|------------|--------------------|------------|
| O(5)#2-Na(1)-O(3)#1 | 100.41(15) | O(4)#7-V(1)-O(1)   | 77.20(14)  |
| O(5)-Na(1)-O(3)     | 81.74(16)  | O(4)#7-V(1)-O(2)   | 149.81(16) |
| O(5)#3-Na(1)-O(3)#4 | 172.47(16) | O(4)#7-V(1)-O(2)#6 | 81.33(14)  |
| O(5)#2-Na(1)-O(4)#2 | 62.99(14)  | O(4)-Se(1)-O(2)    | 95.27(17)  |
| O(5)-Na(1)-O(4)#2   | 140.04(16) | O(5)-Se(1)-O(2)    | 104.83(18) |
| O(5)-Na(1)-O(5)#2   | 89.86(15)  | O(5)-Se(1)-O(4)    | 99.50(18)  |
| O(5)-Na(1)-O(5)#3   | 83.57(15)  |                    |            |

---

Symmetry transformations used to generate equivalent atoms:

|                         |                            |                            |
|-------------------------|----------------------------|----------------------------|
| #1 $-x+3/2, -y+1/2, -z$ | #2 $-x+3/2, y-1/2, -z+1/2$ | #3 $-x+3/2, y+1/2, -z+1/2$ |
| #4 $x, y-1, z$          | #5 $x, y+1, z$             | #6 $-x+2, y, -z+1/2$       |
| #7 $x, -y+1, z-1/2$     | #8 $x, -y+1, z+1/2$        |                            |

---

**Table S4.** Previously reported partial bond lengths (Å) and angles (°) for vanadium selenates.

---

| KV <sub>2</sub> SeO <sub>7</sub>         |            |                  |            |
|------------------------------------------|------------|------------------|------------|
| V(1)-O(2)×2                              | 1.640(9)   | V(2)-O(2)×2      | 1.952(8)   |
| V(1)-O(3)                                | 1.802(9)   | V(2)-O(1)        | 2.192(9)   |
| V(2)-O(5)                                | 1.603(9)   | Se(1)-O(3)       | 1.732(10)  |
| V(1)-O(1)                                | 1.643(9)   | Se(1)-O(4)×2     | 1.669(6)   |
| V(2)-O(4)×2                              | 2.012(8)   | O(2)-V(1)-O(1)   | 111.4(3)   |
| O(2)-V(1)-O(2)                           | 108.6(8)   | O(1)-V(1)-O(3)   | 107.9(5)   |
| O(2)-V(1)-O(3)                           | 108.8(4)   | O(2)-V(2)-O(2)   | 87.3(7)    |
| O(5)-V(2)-O(2)                           | 99.7(4)    | O(2)-V(2)-O(4)   | 90.5(4)    |
| O(5)-V(2)-O(4)                           | 94.9(3)    | O(5)-V(2)-O(1)   | 175.2(5)   |
| O(4)-V(2)-O(4)                           | 87.9(4)    | O(4)-V(2)-O(1)   | 81.6(3)    |
| O(2)-V(2)-O(1)                           | 83.8(3)    | O(4)-Se-O(3)     | 95.7(3)    |
| V(1)-O(2)-V(2)                           | 166.1(6)   | O(4)-Se-O(4)     | 100.5(5)   |
| Sr(VO <sub>2</sub> F)(SeO <sub>3</sub> ) |            |                  |            |
| V(1)-O(5)                                | 1.618(3)   | V(1)-O(4)#4      | 2.304(3)   |
| V(1)-O(4)                                | 1.667(3)   | Se(1)-O(1)       | 1.651(3)   |
| V(1)-O(2)#3)                             | 1.968(3)   | Se(1)-O(3)       | 1.736(3)   |
| V(1)-O(3)#7                              | 1.969(3)   | Se(1)-O(2)       | 1.747(3)   |
| O(1)-Se(1)-O(3)                          | 103.24(13) | O(5)-V(1)-O(4)   | 105.73(13) |
| O(1)-Se(1)-O(2)                          | 100.75(13) | O(5)-V(1)-O(2)#1 | 99.61(14)  |
| O(3)-Se(1)-O(2)                          | 102.69(13) | O(4)-V(1)-O(2)#1 | 96.28(13)  |

---

---

|                    |            |                    |            |
|--------------------|------------|--------------------|------------|
| O(5)-V(1)-O(3)#3   | 100.56(13) | O(2)#1-V(1)-O(3)#3 | 154.43(11) |
| O(4)-V(1)-O(3)#3   | 93.21(12)  | O(5)-V(1)-O(4)#2   | 171.46(12) |
| O(4)-V(1)-O(4)#2   | 82.76(11)  | O(2)#1-V(1)-O(4)#2 | 79.98(11)  |
| O(3)#3-V(1)-O(4)#2 | 77.74(11)  |                    |            |

Ba(VO<sub>2</sub>F)(SeO<sub>3</sub>)

|                    |            |                  |            |
|--------------------|------------|------------------|------------|
| V(1)-O(4)          | 1.623(3)   | V(1)-O(2)#5      | 2.304(3)   |
| V(1)-O(2)          | 1.664(3)   | Se(1)-O(1)       | 1.648(3)   |
| V(1)-O(3)          | 1.976(3)   | Se(1)-O(5)       | 1.734(3)   |
| V(1)-O(5)#5        | 1.972(3)   | Se(1)-O(3)       | 1.740(3)   |
| O(1)-Se(1)-O(5)    | 103.05(15) | O(1)-Se(1)-O(3)  | 101.04(14) |
| O(5)-Se(1)-O(3)    | 102.90(14) | O(4)-V(1)-O(2)   | 104.86(15) |
| O(4)-V(1)-O(3)     | 98.27(14)  | O(2)-V(1)-O(3)   | 95.99(13)  |
| O(4)-V(1)-O(5)#1   | 102.98(13) | O(2)-V(1)-O(5)#1 | 93.96(13)  |
| O(3)-V(1)-O(5)#1   | 153.34(12) | O(4)-V(1)-O(2)#1 | 172.25(14) |
| O(2)-V(1)-O(2)#1   | 82.59(12)  | O(3)-V(1)-O(2)#1 | 78.52(11)  |
| O(5)#1-V(1)-O(2)#1 | 78.33(10)  |                  |            |

---



**Table S5.** Comparison of birefringence in some crystals

| No | Compounds                                                      | Space group                  | Cutoff edge | $\Delta n$           |
|----|----------------------------------------------------------------|------------------------------|-------------|----------------------|
| 1  | YVO <sub>4</sub>                                               | <i>I4<sub>1</sub>/amd</i>    | 400 nm      | 0.208 @1064 nm       |
| 2  | LiNbO <sub>3</sub>                                             | <i>R3c</i>                   | 420 nm      | 0.074@546 nm         |
| 3  | TiO <sub>2</sub>                                               | <i>P42/mnm</i>               | 400 nm      | 0.256@1530 nm        |
| 4  | Li <sub>3</sub> VO <sub>4</sub>                                | <i>Pmn2<sub>1</sub></i>      | 290 nm      | Cal 0.01@500-1100 nm |
| 5  | $\beta$ -Ti <sub>3</sub> VO <sub>4</sub>                       | <i>Imm2</i>                  | 401 nm      | Cal 0.057 @1064 nm   |
| 6  | LiNaV <sub>2</sub> O <sub>6</sub>                              | <i>C2/c</i>                  | 385 nm      | Cal 0.137 @546 nm    |
| 7  | Ca <sub>3</sub> V <sub>2</sub> O <sub>8</sub>                  | <i>R3c</i>                   | 349 nm      | 0.023 @546 nm        |
| 8  | NaCa <sub>4</sub> V <sub>5</sub> O <sub>17</sub>               | <i>P<math>\bar{1}</math></i> | 345 nm      | Cal 0.1 @1064 nm     |
| 9  | Cs <sub>2</sub> Zn <sub>4</sub> V <sub>4</sub> O <sub>15</sub> | <i>C2/c</i>                  | 372 nm      | Cal 0.014@1064 nm    |
| 10 | NaVSeO <sub>5</sub>                                            | <i>C2/c</i>                  | 336nm       | 0.180@546 nm         |

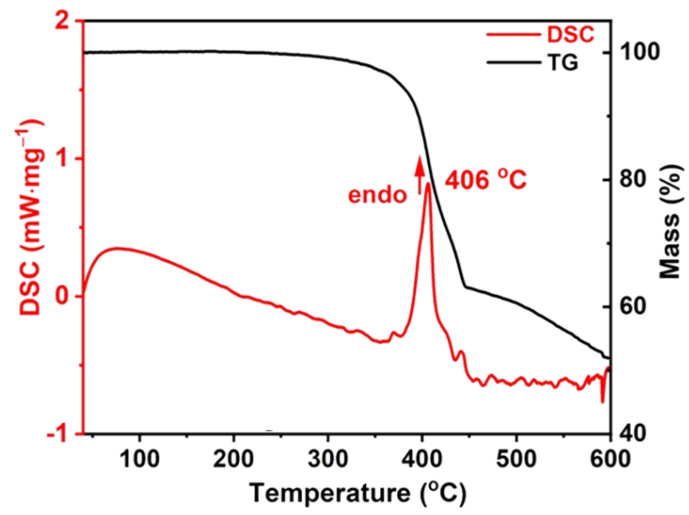

**Figure S1.** Thermal properties of TG-DSC curves of NaVSeO<sub>5</sub>

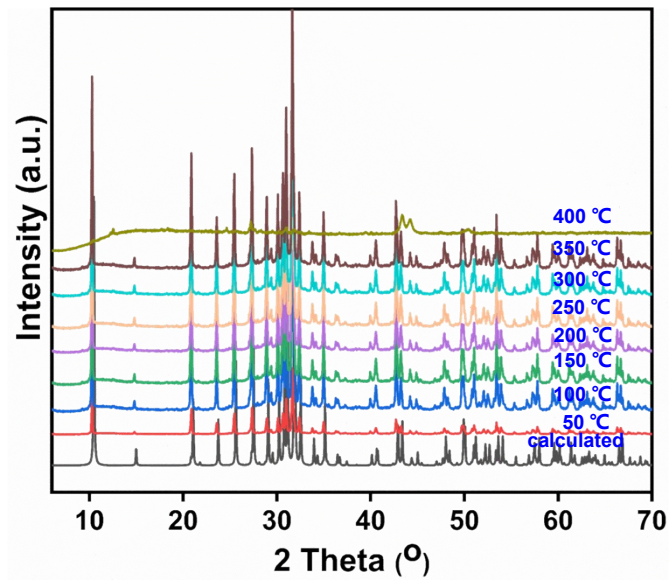

**Figure S2.** Powder X-ray diffraction patterns of annealing experiments on NaVSeO<sub>5</sub>.

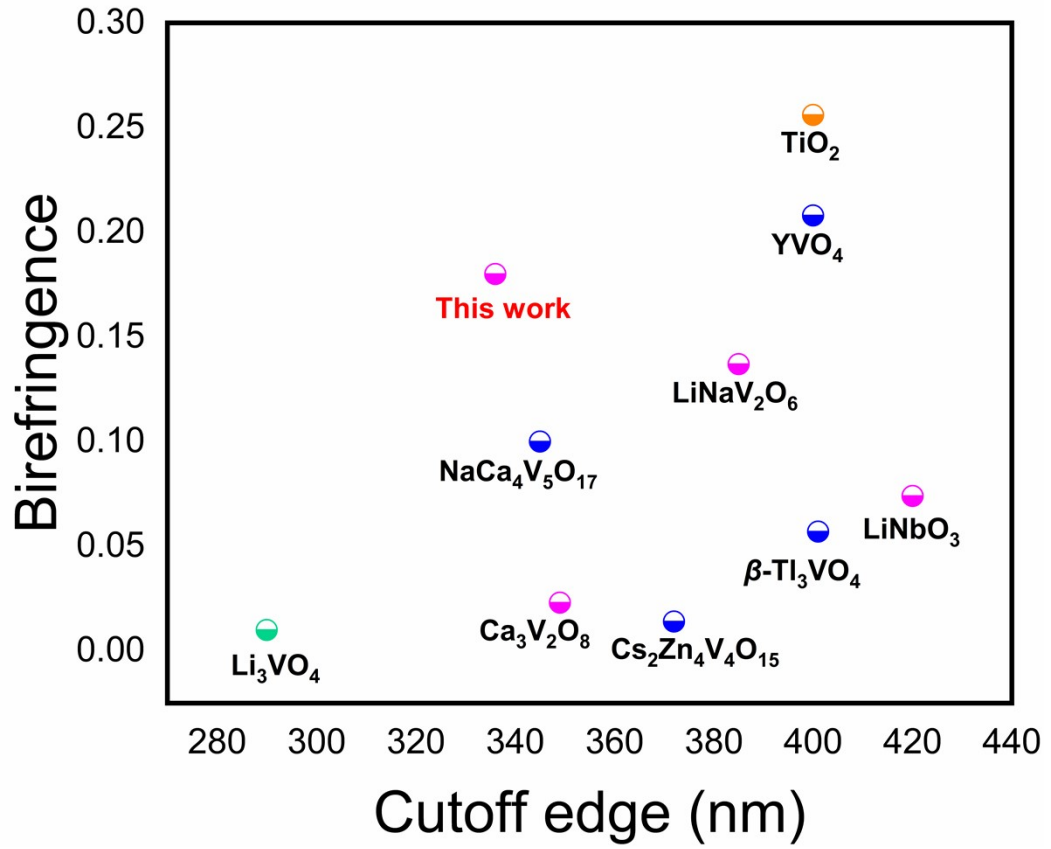

Figure S3. Comparison of birefringence in some crystals
